# Supplementary material for: Integrated transcriptomic analysis of distance-related field cancerization in rectal cancer patients
Source: PubMed Central journal article supplement (PMC5617410; doi:10.18632/oncotarget.17864), 2017-05-15
Supplement: oncotarget-08-61107-s001.pdf [file oncotarget-08-61107-s001.pdf]

# Integrated transcriptomic analysis of distance-related field cancerization in rectal cancer patients

## SUPPLEMENTARY MATERIALS

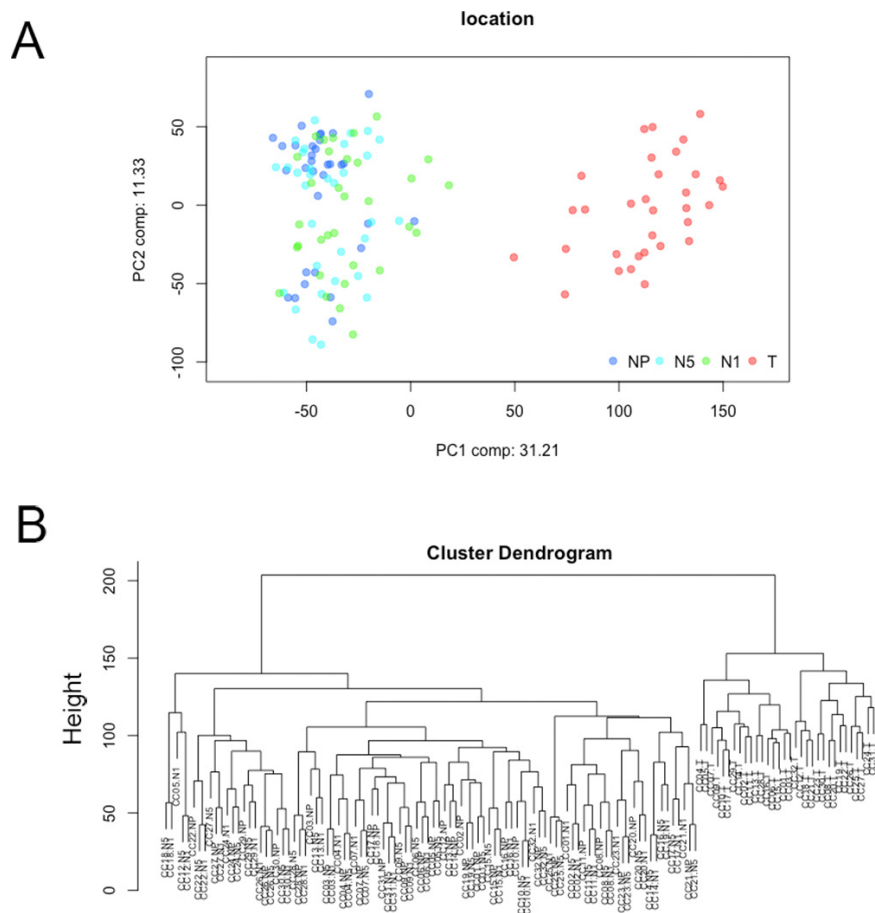

**Supplementary Figure 1: PCA and hierarchical clustering of the data.** X axis and Y axis of (A) represent the principle component 1 and 2 of the PCA, respectively. (B) shows the hierarchical clustering of the samples.

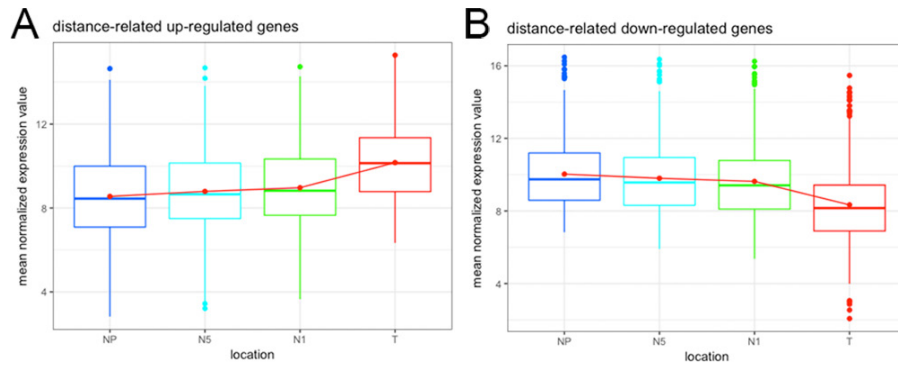

**Supplementary Figure 2: Expression pattern of distance-related differentially expressed genes identified by linear mixed effects model. (A) and (B) show the gradually up regulated and down regulated genes, respectively.**

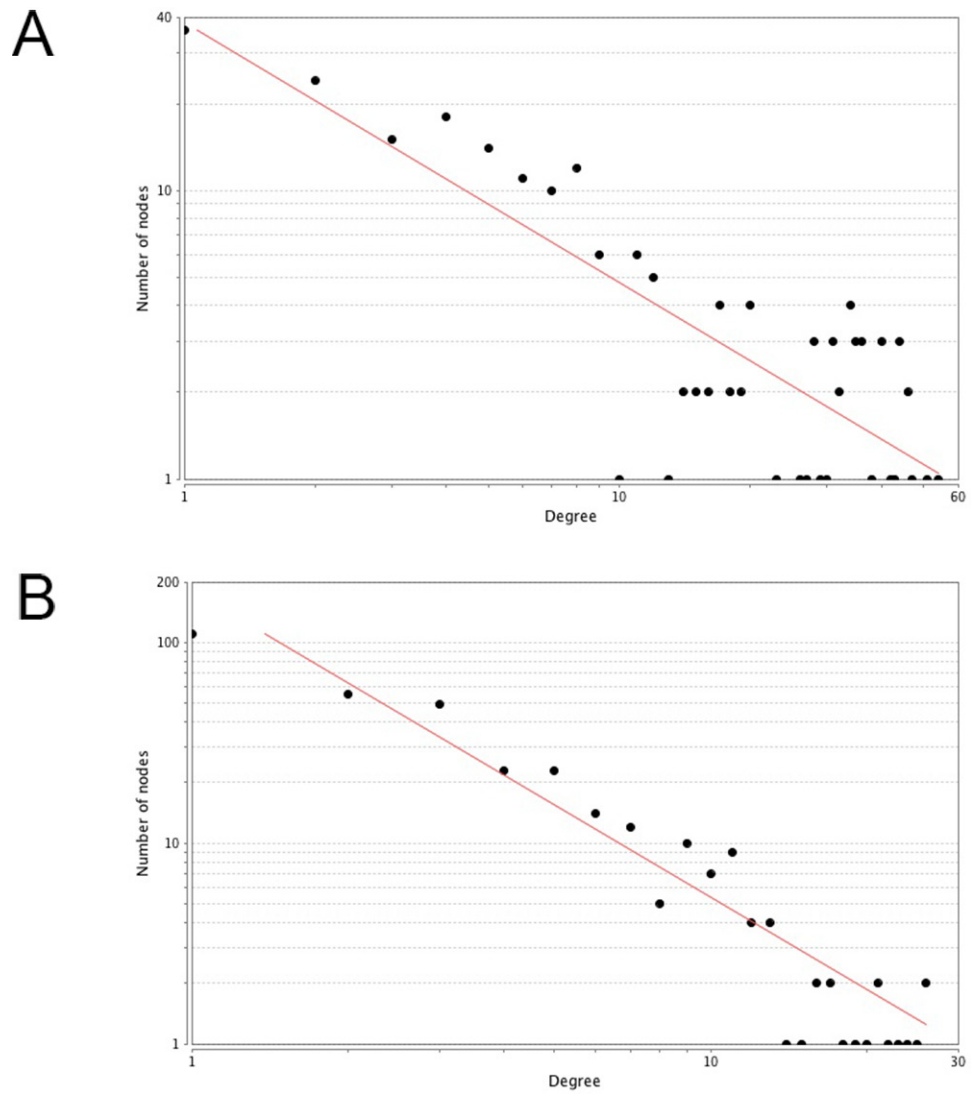

**Supplementary Figure 3: Power law distribution of the nodes of the two PPI networks.** (A) shows the node degree distribution of the up-regulated PPI network. (B) shows the node degree distribution of the down-regulated PPI network.

Supplementary Table 1: Clinical characteristics of the patients

| No. | Age (year) | Gender | Diagnosis         | NP (cm) | Polyps  | Size (cm <sup>2</sup> ) | Differentiation | TNM |
|-----|------------|--------|-------------------|---------|---------|-------------------------|-----------------|-----|
| 1   | 55         | F      | Rectal cancer     | 18      | With    | 1.5                     | Well and mod    | I   |
| 2   | 50         | F      | Rectal cancer     | 24      | With    | 2                       | Mod             | I   |
| 3   | 64         | M      | Rectal cancer     | 15      | With    | 4.5                     | Mod             | I   |
| 4   | 67         | M      | Rectal cancer     | 12      | With    | 5.5                     | Well and mod    | III |
| 5   | 59         | M      | Rectal cancer     | 20      | Without | 4                       | Mod             | I   |
| 6   | 48         | M      | Rectal cancer     | 7       | With    | 3.8                     | Mod             | III |
| 7   | 47         | M      | Rectal cancer     | 8       | With    | 5                       | Mod             | II  |
| 8   | 60         | F      | Rectal cancer     | 25      | Without | 3.5                     | Mod             | I   |
| 9   | 43         | M      | Rectal cancer     | 8       | With    | 5.5                     | Mod             | II  |
| 10  | 62         | M      | Rectal cancer     | 11      | With    | 4                       | Mod             | I   |
| 11  | 39         | F      | Rectal cancer     | 20      | Without | 2.5                     | Mod             | III |
| 12  | 68         | F      | Colorectal cancer | 30      | With    | 3.5                     | Mod             | I   |
| 13  | 71         | M      | Rectal cancer     | 20      | With    | 6.2                     | Well and mod    | III |
| 14  | 68         | M      | Rectal cancer     | 15      | Without | 9                       | Mod             | II  |
| 15  | 50         | M      | Rectal cancer     | 15      | With    | 4                       | Mod and poorly  | I   |
| 16  | 79         | M      | Rectal cancer     | 6       | Without | 8                       | Mod             | IV  |
| 17  | 47         | M      | Rectal cancer     | 10      | Without | 3                       | Mod             | I   |
| 18  | 66         | F      | Rectal cancer     | 10      | Without | 4.5                     | Mod             | II  |
| 19  | 76         | M      | Rectal cancer     | 8       | Without | 7.5                     | Mod             | II  |
| 20  | 59         | F      | Rectal cancer     | 15      | Without | 4                       | Mod             | II  |
| 21  | 43         | M      | Rectal cancer     | 15      | Without | 3                       | Mod and poorly  | III |
| 22  | 69         | F      | Rectal cancer     | 16      | Without | 5                       | Mod             | III |
| 23  | 46         | F      | Rectal cancer     | 6       | With    | 3.8                     | Well            | II  |
| 24  | 74         | M      | Rectal cancer     | 8       | Without | 3.5                     | Well and mod    | III |
| 25  | 56         | M      | Rectal cancer     | 12      | With    | 4.5                     | Mod             | II  |
| 26  | 74         | F      | Rectal cancer     | 10      | Without | 2.5                     | Mod             | I   |
| 27  | 27         | F      | Rectal cancer     | 8       | Without | 6.4                     | Mod and poorly  | I   |
| 28  | 63         | M      | Rectal cancer     | 6       | With    | 3.5                     | Well and mod    | III |
| 29  | 63         | F      | Rectal cancer     | 15      | Without | 2.8                     | Mod             | III |
| 30  | 41         | F      | Rectal cancer     | 16      | Without | 5                       | Mod             | II  |
| 31  | 70         | M      | Rectal cancer     | 7       | Without | 2                       | Mod             | I   |
| 32  | 70         | M      | Rectal cancer     | 12      | Without | 5.8                     | Mod and poorly  | III |

**Supplementary Table 2: Gene list of the distance-related up-regulated genes identified by linear mixed effects model analysis**

See Supplementary File 1

**Supplementary Table 3: Gene list of the distance-related down-regulated genes identified by linear mixed effects model analysis**

See Supplementary File 2

Supplementary Table 4: Clinical characteristics of the multistep carcinogenesis samples

|             |        | Normal | Adenoma | Cancer |
|-------------|--------|--------|---------|--------|
| Gender      | Male   | 7      | 34      | 18     |
|             | Female | 5      | 17      | 7      |
|             | Total  | 12     | 51      | 25     |
| Age (years) |        | 46±14  | 60±15   | 65±12  |
| Stage       | I      | –      | –       | 9      |
|             | II     | –      | –       | 4      |
|             | III    | –      | –       | 11     |
|             | IV     | –      | –       | 1      |
